# Supplementary material
Source: publisher figshare collection journal article supplement (https://sage.figshare.com/ndownloader/files/21301206)
Supplement: Supplementary file 1 [file 21301206]

## Appendix

### Interview outline

Tell me how the program went.

Tell me about how you set up the group(s) you facilitated.

If you came across difficulties in the planning stage, what were they? How did you overcome them? How did you work with your fellow facilitator?

Let's now talk about how the workshops went.

Did you have to adapt/amend some activities? (If so, explain which ones, why and how). Which activities were the easiest/most difficult to facilitate?

According to you, did participants' characteristics influence the organization of workshops, and if so, how?

Let's now talk about the training you should have received before facilitating the program during the program. How did it influence the program as a whole?

To conclude, what are your general impressions on the program?

Are there any comments or recommendations you would like to share with us?
